# Supplementary material
Source: Springer Nature journal article supplement (https://www.springermedizin.de/resource/supplementary/12889_2009_2274_MOESM2_ESM.pdf/9485214)

Kcal

2400  
2300  
2200  
2100  
2000  
1900  
1800  
1700  
1600

Preadolescence

Adolescence

Time evolution

▲ V/V  
■ V/M+M/M

$p=0.033$

$p=0.387$

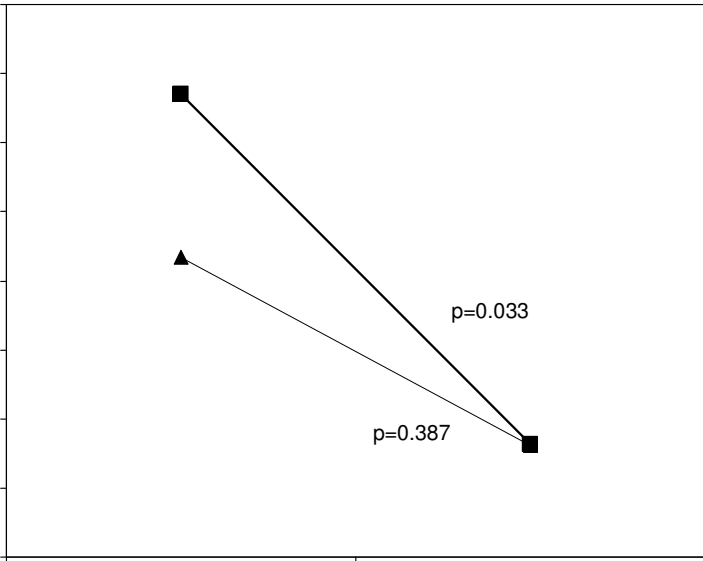

Supplement: MOESM2 [file 9485214]
